# Supplementary material
Source: Springer Nature journal article supplement (https://www.springermedizin.de/resource/supplementary/12990_2008_165_MOESM7_ESM.pdf/9612704)
Supplement: MOESM7 [file 9612704]

**Tissue damage**

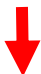

**Microvascular IR injury**

**free radicals, NF $\kappa$ B & cytokines**

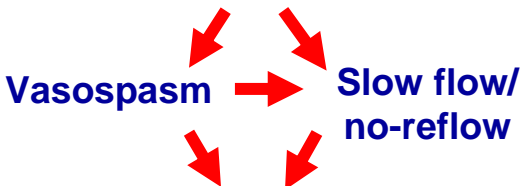

**Muscle ischemia**



**Lactate &  
inflammatory mediators**

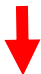

**Muscle afferent  
activation/sensitization**

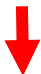

**Prolonged CNS sensitization**

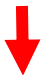

**Cutaneous tactile allodynia**
